# Supplementary material for: Survey of transfusion practices in preterm infants in Europe
Source: PubMed Central journal article supplement — Arch Dis Child Fetal Neonatal Ed. 2023 Jan 18;108(4):360–6. doi: 10.1136/archdischild-2022-324619 (PMC10314003; doi:10.1136/archdischild-2022-324619), 2023-01-18
Supplement: fetalneonatal-2022-324619supp001.pdf [file fetalneonatal-2022-324619supp001.pdf]

## Survey of Transfusion Practices in European Preterm Infants – supplementary materials.

Alexandra Scrivens<sup>1</sup>, Nora-Johanna Reibel<sup>2</sup>, Lianne Heeger<sup>3</sup>, Simon J Stanworth<sup>4-6</sup>, Enrico Lopriore<sup>7</sup>, Helen New<sup>8</sup>, Christof Dame<sup>2</sup>, Karin Fijnvandraat<sup>9</sup>, Emöke Deschmann<sup>10-11</sup>, Marta Aguar Carrascosa<sup>12</sup>, Kristin Brække<sup>13</sup>, Francesco Cardona<sup>14</sup>, Filip Cools<sup>15</sup>, Ryan Farrugia<sup>16</sup>, Stefano Ghirardello<sup>17</sup>, Jana Lozar Krivec<sup>18</sup>, Katarina Matasova<sup>19</sup>, Tobias Mühlbacher<sup>20</sup>, Ulla Sankilampi<sup>21</sup>, Henrique Soares<sup>22</sup>, Miklós Szabó<sup>23</sup>, Tomasz Szczapa<sup>24</sup>, Gabriela Zaharie<sup>25</sup>, Charles Christoph Roehr<sup>26-28</sup> and Suzanne Fustolo-Gunnink<sup>3,7</sup>, on behalf of the Neonatal Transfusion Network.

### Content

|                                                                                                                                                                                                         |               |           |
|---------------------------------------------------------------------------------------------------------------------------------------------------------------------------------------------------------|---------------|-----------|
| Comparison of trial thresholds and allocation of survey clinical scenarios to TOP and ETTNO treatment categories. Overview of restrictive and liberal transfusion thresholds in the largest RBC trials. | Tables S1-S2. | Page 2-3  |
| Results of weighted analysis.                                                                                                                                                                           | Tables S3-S6  | Page 4-5  |
| Results of non-responder analysis                                                                                                                                                                       | Table S7      | Page 6-7  |
| Questionnaire                                                                                                                                                                                           | Questionnaire | Page 8-15 |
| List of participating neonatal (research) networks                                                                                                                                                      |               | Page 16   |

## COMPARISON OF TRIAL THRESHOLDS AND ALLOCATION OF SURVEY CLINICAL SCENARIOS TO TOP AND ETTNO TREATMENT CATEGORIES AND OVERVIEW OF RESTRICTIVE AND LIBERAL TRANSFUSION THRESHOLDS IN THE LARGEST RBC TRIALS.

**Table S1. Comparison of ETTNO and TOP trial thresholds and selection of restrictive and liberal ETTNO/TOP threshold for each of 15 clinical scenarios.**

| Clinical scenario               | Critical or non-critical in ETTNO trial[1]                       | Critical or non-critical in TOP trial[2]                 | Selected ETTNO/TOP threshold in g/dL for < 1 week | Selected ETTNO/TOP threshold in g/dL for 1-2 weeks | Selected ETTNO/TOP threshold in g/dL for >2 weeks |
|---------------------------------|------------------------------------------------------------------|----------------------------------------------------------|---------------------------------------------------|----------------------------------------------------|---------------------------------------------------|
| <b>Mechanically ventilated</b>  | Critical                                                         | Critical                                                 | Restrictive: 11.0<br>Liberal: 13.7                | Restrictive: 10.0<br>Liberal: 12.5                 | Restrictive: 8.5<br>Liberal: 12.3                 |
| <b>CPAP with FIO2 &gt;0.30</b>  | Critical or non-critical<br><i>Trial cut off 12 hrs</i>          | Critical or non-critical<br><i>Trial cut off 0.35</i>    | Restrictive: 9.3<br>Liberal: 13.7                 | Restrictive: 8.0<br>Liberal: 12.5                  | Restrictive: 7.0<br>Liberal: 12.3                 |
| <b>CPAP with FIO2 &lt; 0.30</b> | Critical or non-critical<br><i>Trial cut off 0.25 for 12 hrs</i> | Non-critical                                             | Restrictive: 9.3<br>Liberal: 13.7                 | Restrictive: 8.0<br>Liberal: 12.3                  | Restrictive: 7.0<br>Liberal: 12.3                 |
| <b>Low flow (&lt;2 L/min)</b>   | Non-critical                                                     | Critical or non-critical<br><i>Trial cut off 1 L/min</i> | Restrictive: 9.3<br>Liberal: 13.0                 | Restrictive: 8.0<br>Liberal: 12.5                  | Restrictive: 7.0<br>Liberal: 11.0                 |
| <b>No respiratory support</b>   | Non-critical                                                     | Non-critical                                             | Restrictive: 9.3<br>Liberal: 12.0                 | Restrictive: 8.0<br>Liberal: 11.0                  | Restrictive: 7.0<br>Liberal: 10.3                 |

Critical = critical health state (ETTNO definition) or respiratory support (TOP definition). Non-critical = non-critical health state (ETTNO definition) or no respiratory support (TOP definition). Hb = hemoglobin. After categorization as critical or non-critical for in both trials, the highest threshold tested in either one of the trials was selected as liberal threshold and the lowest in either one as restrictive threshold.

### Example of comparison in more detail

Infants on CPAP with FIO2 >0.30 would meet the 'critical' criteria for ETTNO only if the respiratory requirements persisted for at least 12 hours, but we did not specify a timeframe in our survey. For TOP, these infants would meet the criteria for 'critical' only if FIO2>0.35. This clinical scenario could therefore be classified as both 'critical' and 'non-critical' in both trials, leading to a relatively wide *ETTNO/TOP threshold* range of, for example for children more than two weeks old, 7.0 (restrictive) to 12.3 g/dL (liberal)

**Table S2. Overview of restrictive and liberal transfusion thresholds in the four largest RBC RCTs.****Restrictive study arms in RBC trials.**

|                                     | TOP[2]               |            | ETTNO <sup>#</sup> [1] |              | PINT <sup>##</sup> [3] |            | IOWA[4]              |                       |                        |
|-------------------------------------|----------------------|------------|------------------------|--------------|------------------------|------------|----------------------|-----------------------|------------------------|
|                                     | Respiratory support* | No support | Critical**             | Non-critical | Respiratory support*** | No support | Phase 1 <sup>§</sup> | Phase 2 <sup>§§</sup> | Phase 3 <sup>§§§</sup> |
| Randomization to 7 days after birth | 11.0                 | 10.0       | 11.3                   | 9.3          | 11.5                   | 10.0       | 11.3                 | 9.3                   | 7.3                    |
| Day of life 8-14                    | 10.0                 | 8.5        | 10.0                   | 8.0          | 10.0                   | 8.5        | 11.3                 | 9.3                   | 7.3                    |
| Day of life 15-21                   | 8.5                  | 7.0        | 10.0                   | 8.0          | 8.5                    | 7.5        | 11.3                 | 9.3                   | 7.3                    |
| Older than 21 days                  | 8.5                  | 7.0        | 9.0                    | 7.0          | 8.5                    | 7.5        | 11.3                 | 9.3                   | 7.3                    |

**Liberal study arms in RBC trials.**

|                                     | TOP                  |            | ETTNO <sup>#</sup> |              | PINT <sup>##</sup>     |            | IOWA                 |                       |                        |
|-------------------------------------|----------------------|------------|--------------------|--------------|------------------------|------------|----------------------|-----------------------|------------------------|
|                                     | Respiratory support* | No support | Critical**         | Non-critical | Respiratory support*** | No support | Phase 1 <sup>§</sup> | Phase 2 <sup>§§</sup> | Phase 3 <sup>§§§</sup> |
| Randomization to 7 days after birth | 13.0                 | 12.0       | 13.7               | 11.7         | 13.5                   | 12.0       | 15.3                 | 12.7                  | 10.0                   |
| Day of life 8-14                    | 12.5                 | 11.0       | 12.3               | 10.3         | 12.0                   | 10.0       | 15.3                 | 12.7                  | 10.0                   |
| Day of life 15-21                   | 11.0                 | 10.0       | 12.3               | 10.3         | 10.0                   | 8.5        | 15.3                 | 12.7                  | 10.0                   |
| Older than 21 days                  | 11.0                 | 10.0       | 11.3               | 9.3          | 10.0                   | 8.5        | 15.3                 | 12.7                  | 10.0                   |

\*mechanical ventilation, continuous positive airway pressure, FiO<sub>2</sub> >0.35, or nasal cannula ≥1 liter per min (room air nasal cannula ≥1 liter per min was considered respiratory support).

\*\* at least 1 of the following criteria: invasive mechanical ventilation, continuous positive airway pressure with fraction of inspired oxygen >0.25 for >12 hours per 24 hours, treatment for patent ductus arteriosus, acute sepsis or necrotizing enterocolitis with circulatory failure requiring inotropic/vasopressor support, >6 nurse-documented apneas requiring intervention per 24 hours, or >4 intermittent hypoxemic episodes with pulse oximetry oxygen saturation <60%.

\*\*\* assisted ventilation, continuous positive airway pressure, or supplemental oxygen.

<sup>#</sup> a conversion factor of 3.0 was used to convert IOWA and ETTNO thresholds.

<sup>##</sup> different thresholds were specified for capillary and central blood sampling strategies, capillary thresholds are reported here.

<sup>§</sup> tracheally intubated for assisted ventilation

<sup>§§</sup> nasal continuous positive airway pressure or supplemental oxygen

<sup>§§§</sup> neither positive pressure nor oxygen

The Cochrane systematic review by Whyte et al [5] summarized the restrictive thresholds evaluated in their review as reported below. These thresholds are identical to the PINT thresholds.

| Postnatal Age | Respiratory Support             | No Respiratory Support |
|---------------|---------------------------------|------------------------|
|               | Haemoglobin g/l (Haematocrit %) |                        |
| Week 1        | 115 (35%)                       | 100 (30%)              |
| Week 2        | 100 (30%)                       | 85 (25%)               |
| Week 3        | 85 (25%)                        | 75 (23%)               |

## References

- 1 Franz AR, Engel C, Bassler D, *et al.* Effects of liberal vs restrictive transfusion thresholds on survival and neurocognitive outcomes in extremely low-birth-weight infants: The ETTNO randomized clinical trial. *JAMA - J Am Med Assoc* 2020;**324**:560–70. doi:10.1001/jama.2020.10690
- 2 Kirpalani H, Bell EF, Hintz SR, *et al.* Higher or Lower Hemoglobin Transfusion Thresholds for Preterm Infants. *N Engl J Med* 2020;**383**:2639–51. doi:10.1056/nejmoa2020248
- 3 Kirpalani H, Whyte RK, Andersen C, *et al.* The premature infants in need of transfusion (pint) study: A randomized, controlled trial of a restrictive (LOW) versus liberal (HIGH) transfusion threshold for extremely low birth weight infants. *J Pediatr* 2006;**149**. doi:10.1016/j.jpeds.2006.05.011
- 4 Bell E, Strauss R, Widness J, *et al.* Randomized Trial of Liberal Versus Restrictive Guidelines for Red Blood Cell Transfusion in Preterm Infants. *Pediatrics* 2005;**115**:1685–91. doi:10.1542/peds.2004-1884
- 5 Whyte R, Kirpalani H. Low versus high haemoglobin concentration threshold for blood transfusion for preventing morbidity and mortality in very low birth weight infants. *Cochrane Database Syst Rev* Published Online First: 2011. doi:10.1002/14651858.cd000512.pub2

## RESULTS OF WEIGHTED ANALYSIS

Tables S3 and S4 show the median and interquartile ranges for hemoglobin and platelet count threshold for transfusion in a weighted analysis, where each center was assigned a weight equal to the number of NICU's included in their country divided by the total number of eligible NICUs in their country. This is a way to correct for biased outcomes as a result of variable response rates. Table S5 shows the weighted analysis of transfusion duration, volume and rate. Table S6 shows the weighted FFP indications. As can be seen, few changes occur as a result of weighting (highlighted), suggesting limited impact of variable response rates on our findings.

**Table S3. Weighted and unweighted median and interquartile ranges for hemoglobin transfusion thresholds**

|                    | Unweighted median (IQR) |           | Weighted median (IQR) |           |
|--------------------|-------------------------|-----------|-----------------------|-----------|
| <b>&lt;1 week</b>  |                         |           |                       |           |
| Air                | 95                      | (84-100)  | 90                    | (84-100)  |
| Low flow           | 100                     | (90-110)  | 100                   | (90-105)  |
| High flow <30%     | 102                     | (96-113)  | 102                   | (99-110)  |
| High flow >30%     | 105                     | (100-120) | 105                   | (100-120) |
| Intubated          | 115                     | (105-120) | 115                   | (105-120) |
| <b>1-2 weeks</b>   |                         |           |                       |           |
| Air                | 80                      | (72-89)   | 80                    | (72-85)   |
| Low flow           | 90                      | (80-100)  | 90                    | (80-95)   |
| High flow <30%     | 90                      | (90-100)  | 90                    | (90-100)  |
| High flow >30%     | 100                     | (90-105)  | 100                   | (90-105)  |
| Intubated          | 100                     | (90-110)  | 100                   | (90-110)  |
| <b>&lt;2 weeks</b> |                         |           |                       |           |
| Air                | 75                      | (69-80)   | 75                    | (69-80)   |
| Low flow           | 80                      | (75-90)   | 80                    | (75-85)   |
| High flow <30%     | 85                      | (77-90)   | 85                    | (77-90)   |
| High flow >30%     | 90                      | (81-100)  | 90                    | (81-100)  |
| Intubated          | 96                      | (85-105)  | 100                   | (85-105)  |

**Table S4. Weighted and unweighted median and interquartile ranges for platelet count transfusion thresholds**

|                        | Unweighted median (IQR) |          | Weighted median (IQR) |          |
|------------------------|-------------------------|----------|-----------------------|----------|
| <b>&lt;28 weeks GA</b> |                         |          |                       |          |
| No bleeding            | 30                      | (20-45)  | 30                    | (20-40)  |
| Ibuprofen              | 50                      | (39-60)  | 50                    | (40-60)  |
| Lumbar puncture        | 50                      | (50-50)  | 50                    | (50-50)  |
| Surgery                | 99                      | (50-100) | 100                   | (50-100) |
| Active bleeding        | 50                      | (50-99)  | 50                    | (50-100) |
| <b>28-32 weeks GA</b>  |                         |          |                       |          |
| No bleeding            | 25                      | (20-30)  | 25                    | (20-30)  |
| Ibuprofen              | 50                      | (30-50)  | 50                    | (35-60)  |
| Lumbar puncture        | 50                      | (50-50)  | 50                    | (50-50)  |
| Surgery                | 80                      | (50-100) | 100                   | (50-100) |
| Active bleeding        | 50                      | (50-80)  | 50                    | (50-80)  |

**Table S5. Weighted and unweighted median and interquartile ranges for transfusion volume, duration and rate.**

|                             | Unweighted median (IQR) |             | Weighted median (IQR) |             |
|-----------------------------|-------------------------|-------------|-----------------------|-------------|
| <b>RBC</b>                  |                         |             |                       |             |
| Volume                      | 15.0                    | (15.0-20.0) | 15.0                  | (15.0-20.0) |
| Duration                    | 4.0                     | (3.0-4.0)   | 4.0                   | (3.0-4.0)   |
| Rate                        | 4.0                     | (3.8-5.0)   | 5.0                   | (3.8-5.0)   |
| <b>Platelet transfusion</b> |                         |             |                       |             |
| Volume                      | 15.0                    | (15.0-15.0) | 15.0                  | (15.0-15.0) |
| Duration                    | 1.0                     | (0.5-2.0)   | 1.0                   | (0.5-2.0)   |
| Rate                        | 15.0                    | (7.5-20.0)  | 15.0                  | (10.0-30.0) |
| <b>FFP</b>                  |                         |             |                       |             |
| Volume                      | 15.0                    | (15.0-20.0) | 15.0                  | (15.0-18.0) |
| Duration                    | 2.0                     | (1.0-3.0)   | 2.0                   | (1.0-2.0)   |
| Rate                        | 10.0                    | (5.0-15.0)  | 10.0                  | (5.0-15.0)  |

**Table S6. Weighted and unweighted proportions for FFP indications**

|                                      | Unweighted proportion (95% CI) |             | Weighted proportion (95% CI) |             |
|--------------------------------------|--------------------------------|-------------|------------------------------|-------------|
| Coagulopathy with active bleeding    | 93.3                           | (90.3-95.6) | 93.8                         | (91.7-95.5) |
| Active bleeding without coagulopathy | 46.1                           | (40.8-51.4) | 45.0                         | (40.9-48.9) |
| Coagulopathy without active bleeding | 38.8                           | (33.7-44.0) | 39.8                         | (36.0-43.8) |
| Sepsis                               | 26.5                           | (22.1-31.4) | 25.8                         | (22.4-29.4) |
| Hypotension                          | 24.8                           | (20.4-29.5) | 23.8                         | (20.5-27.3) |

## RESULTS OF NON-RESPONDER ANALYSIS

The table below shows the comparison of responses by early responders (first 20%) and late responders (last 20%), where late responders are considered a proxy for non-responders, with differences highlighted.

**Table S7. Results of non-responder analysis.**

|                                                    | Early responders |       | Late responders |       |
|----------------------------------------------------|------------------|-------|-----------------|-------|
|                                                    | Median           | Count | Median          | Count |
| Threshold_Hb_no_oxygen_first_day                   | 100              |       | 100             |       |
| Threshold_Hb_no_oxygen_first_week                  | 100              |       | 100             |       |
| Threshold_Hb_no_oxygen_2weeks                      | 80               |       | 80              |       |
| Threshold_Hb_no_oxygen_3weeks                      | 75               |       | 75              |       |
| Threshold_Hb_low_flow_first_day                    | 111              |       | 110             |       |
| Threshold_Hb_low_flow_first_week                   | 100              |       | 100             |       |
| Threshold_Hb_low_flow_2weeks                       | 90               |       | 90              |       |
| Threshold_Hb_low_flow_3weeks                       | 80               |       | 80              |       |
| Threshold_Hb_high_flow_oxygen_until_30_first_day   | 115              |       | 115             |       |
| Threshold_Hb_high_flow_oxygen_until_30_first_week  | 105              |       | 105             |       |
| Threshold_Hb_high_flow_oxygen_until_30_2weeks      | 100              |       | 100             |       |
| Threshold_Hb_high_flow_oxygen_until_30_3weeks      | 85               |       | 85              |       |
| Threshold_Hb_high_flow_oxygen_over_30_first_day    | 120              |       | 120             |       |
| Threshold_Hb_high_flow_oxygen_over_30_first_week   | 115              |       | 110             |       |
| Threshold_Hb_high_flow_oxygen_over_30_2weeks       | 100              |       | 100             |       |
| Threshold_Hb_high_flow_oxygen_over_30_3weeks       | 90               |       | 89              |       |
| Threshold_Hb_intubated_ventilated_first_day        | 120              |       | 120             |       |
| Threshold_Hb_intubated_ventilated_first_week       | 116              |       | 120             |       |
| Threshold_Hb_intubated_ventilated_2weeks           | 100              |       | 100             |       |
| Threshold_Hb_intubated_ventilated_3weeks           | 94               |       | 95              |       |
| Threshold_Hct_no_oxygen_first_day                  | 34               |       | 30              |       |
| Threshold_Hct_no_oxygen_first_week                 | 28               |       | 30              |       |
| Threshold_Hct_no_oxygen_2weeks                     | 24               |       | 25              |       |
| Threshold_Hct_no_oxygen_3weeks                     | 21               |       | 23              |       |
| Threshold_Hct_low_flow_first_day                   | 32               |       | 30              |       |
| Threshold_Hct_low_flow_first_week                  | 28               |       | 30              |       |
| Threshold_Hct_low_flow_2weeks                      | 25               |       | 28              |       |
| Threshold_Hct_low_flow_oxygen_3weeks               | 25               |       | 25              |       |
| Threshold_Hct_high_flow_oxygen_until_30_first_day  | 35               |       | 35              |       |
| Threshold_Hct_high_flow_oxygen_until_30_first_week | 30               |       | 32              |       |
| Threshold_Hct_high_flow_oxygen_until_30_2weeks     | 30               |       | 30              |       |
| Threshold_Hct_high_flow_oxygen_until_30_3weeks     | 25               |       | 30              |       |
| Threshold_Hct_high_flow_oxygen_over_30_first_day   | 38               |       | 35              |       |
| Threshold_Hct_high_flow_oxygen_over_30_first_week  | 34               |       | 35              |       |
| Threshold_Hct_high_flow_oxygen_over_30_2weeks      | 30               |       | 30              |       |
| Threshold_Hct_high_flow_oxygen_over_30_3weeks      | 30               |       | 30              |       |
| Threshold_Hct_intubated_ventilated_first_day       | 38               |       | 36              |       |
| Threshold_Hct_intubated_ventilated_first_week      | 35               |       | 35              |       |
| Threshold_Hct_intubated_ventilated_2weeks          | 30               |       | 30              |       |
| Threshold_Hct_intubated_ventilated_3weeks          | 30               |       | 30              |       |
| Volume_RBC_per_kilo                                | 15,0             |       | 15,0            |       |
| Duration_RBC_transfusion                           |                  |       |                 |       |
| 1 hour                                             |                  | 2     |                 | 1     |
| 2 hours                                            |                  | 10    |                 | 5     |
| 3 hours                                            |                  | 11    |                 | 17    |

|                                                     |                                         |    |    |     |    |
|-----------------------------------------------------|-----------------------------------------|----|----|-----|----|
|                                                     | 4 hours                                 |    | 29 |     | 31 |
|                                                     | 5 hours                                 |    | 2  |     | 3  |
|                                                     | 6 hours                                 |    | 10 |     | 9  |
|                                                     | Other                                   |    | 1  |     | 1  |
| Withhold_enteral_feeding                            | no                                      |    | 37 |     | 46 |
|                                                     | yes                                     |    | 24 |     | 16 |
|                                                     | other                                   |    | 6  |     | 5  |
| Threshold_platelets_below_28_weeks_no_bleeding      |                                         | 30 |    | 30  |    |
| Threshold_platelets_below_28_weeks_active_bleeding  |                                         | 50 |    | 50  |    |
| Threshold_platelets_below_28_weeks_ibuprofen        |                                         | 50 |    | 50  |    |
| Threshold_platelets_below_28_weeks_ip               |                                         | 50 |    | 50  |    |
| Threshold_platelets_below_28_weeks_major_surgery    |                                         | 90 |    | 100 |    |
| Threshold_platelets_28_to_32_weeks_no_bleeding      |                                         | 30 |    | 25  |    |
| Threshold_platelets_28_to_32_weeks_active_bleeding  |                                         | 50 |    | 50  |    |
| Threshold_platelets_28_to_32_weeks_ibuprofen        |                                         | 50 |    | 50  |    |
| Threshold_platelets_28_to_32_weeks_ip               |                                         | 50 |    | 50  |    |
| Threshold_platelets_28_to_32_weeks_major_surgery    |                                         | 80 |    | 100 |    |
| Volume_platelets_per_kilo                           |                                         | 15 |    | 15  |    |
| Duration_platelet_transfusion                       | 15 minutes                              |    | 0  |     | 2  |
|                                                     | 30 minutes                              |    | 21 |     | 14 |
|                                                     | 1 hour                                  |    | 22 |     | 26 |
|                                                     | 2 hours                                 |    | 13 |     | 17 |
|                                                     | 3 hours                                 |    | 5  |     | 4  |
|                                                     | 4 hours                                 |    | 3  |     | 3  |
|                                                     | other                                   |    | 2  |     | 2  |
| Indication_FFP_volume_replacement_hypotension       |                                         |    | 9  |     | 23 |
| Indication_FFP_active_bleeding_without_coagulopathy |                                         |    | 26 |     | 32 |
| Indication_FFP_coagulopathy_no_active_bleeding      |                                         |    | 20 |     | 28 |
| Indication_FFP_coagulopathy_active_bleeding         |                                         |    | 67 |     | 62 |
| Indication_FFP_sepsis                               |                                         |    | 17 |     | 21 |
| Volume_FFP_per_kilo                                 |                                         | 15 |    | 15  |    |
| Duration_FFP_transfusion                            | 15 minutes                              |    | 0  |     | 0  |
|                                                     | 30 minutes                              |    | 8  |     | 10 |
|                                                     | 1 hour                                  |    | 25 |     | 19 |
|                                                     | 2 hours                                 |    | 19 |     | 19 |
|                                                     | 3 hours                                 |    | 7  |     | 5  |
|                                                     | 4 hours                                 |    | 7  |     | 13 |
|                                                     | other                                   |    | 1  |     | 2  |
| Routine_diuretics_RBC                               | never                                   |    | 35 |     | 38 |
|                                                     | always                                  |    | 1  |     | 4  |
|                                                     | sometimes                               |    | 30 |     | 24 |
| Routine_diuretics_platelets                         | never                                   |    | 58 |     | 51 |
|                                                     | always                                  |    | 1  |     | 2  |
|                                                     | sometimes                               |    | 7  |     | 12 |
| Routine_diuretics_FFP                               | never                                   |    | 54 |     | 45 |
|                                                     | always                                  |    | 1  |     | 3  |
|                                                     | sometimes                               |    | 9  |     | 18 |
| Consent_non_emergency_transfusion                   | No consent                              |    | 4  |     | 4  |
|                                                     | Verbal consent only                     |    | 2  |     | 10 |
|                                                     | Verbal consent documenten by clinician  |    | 10 |     | 2  |
|                                                     | Verbal and written consent from parents |    | 46 |     | 50 |
|                                                     | Other                                   |    | 4  |     | 1  |



## QUESTIONNAIRE

This document contains all the survey questions that were analyzed in this manuscript. Two questions were not analyzed, see specifications below.

**How many babies are born at <32 weeks gestation at your unit each year?** Due to a Limesurvey error, data entry for this question was inaccurate and could therefore not be analyzed.

**Which form of platelets does your unit use for neonatal transfusions?** One of the answer options was 'Platelet hyperconcentrate', which is a product that is used very sparsely, but would be given at a dose of only 3-5 ml/kg, depending on exact product specifications. On further analyses we observed that many entries that selected 'platelet hyperconcentrate' subsequently reported giving this at a dose of 15 ml/kg. It is likely that these centers use regular platelet transfusion products, not hyperconcentrate, but we were not able to obtain this information. Therefore we have not analyzed these data.

**Do you use any of the following on your neonatal unit? (if yes, please indicate when you would use them):** Antithrombin III, Tranexamic acid, Another agent which promotes clotting/coagulation, Another agent which prevents clotting/coagulation. The specifications that were given for 'another agent' often contained indications that were unlikely to be correct. For example, .. Therefore, these data were considered unreliable and not analyzed or presented.

We did not report RBC thresholds for babies <24 hours of age, because...

The survey also contained questions about treatment with recombinant human erythropoietin and supplementation of iron, which will be analyzed separately and have not been presented here.

# Neonatal blood components survey

Hello,

You have been contacted as a representative clinician for your neonatal unit. As part of an international survey on blood products, we are contacting representatives from neonatal units who regularly care for infants born at <32 weeks' gestation.

We would be very grateful if you could spare a few minutes to help us to better understand the variations in neonatal blood product transfusion practices, which exist across Europe, by answering the following questions on behalf of your neonatal unit.

If practice varies between attending clinicians at your unit, please indicate the response you feel best represents the general consensus amongst senior clinicians in your hospital: we only want one response for each neonatal unit. Please also note that there are no right or wrong answers!

We are looking to develop a network of interested neonatologists, health care professionals, and transfusion specialists aimed at advancing the practice of neonatal transfusion medicine and designing new clinical studies. Please let us know at the end of the survey if you are interested in taking part.

Participation in this survey is voluntary.

No individual, hospital or neonatal unit will be identifiable from any reports or publications from this survey. Location information is collected to allow us to track who has responded and ensure that we have a good representative sample from each country.

If you have any questions or concerns about this survey, please contact the representative for your country (the person who sent you the survey invitation) or [alexandra.scrivens@ouh.nhs.uk](mailto:alexandra.scrivens@ouh.nhs.uk)

There are 30 questions in this survey.

## General Questions

**Does your neonatal unit/hospital routinely look after babies born at less than 32 weeks of completed gestation?**

Please choose **only one** of the following:

- Yes
- No

**How many babies are born at <32 weeks gestation at your unit each year?**

Choose one of the following answers

Please choose **only one** of the following:

- <50
- 50-100
- 100-200
- >200

**Please indicate on the map the location of your hospital.**

Your responses and your hospital will not be identifiable from any report or publication from this survey. Tracking location in this way allows us to track which hospitals have responded to our survey. This information will be used for this purpose only.

Please write your answer here:

## Red Blood Cells

Please answer the following questions relating to how your unit routinely cares for infants born under 32 weeks of gestational age.

**The next questions will ask about the threshold(s) which you use for red cell/blood transfusion in preterm babies. Please select which units your hospital uses to decide whether a blood transfusion is necessary.**

Choose one of the following answers. Please choose **only one** of the following:  
Haemoglobin level in g/L or g/dL / Haematocrit

**What haemoglobin level would use you as a threshold to transfuse the following babies born at <32 weeks' GA?**

Please give answers in g/L where 1.0 g/dL = 10 g/L

Only answer this question if the following conditions are met:

Answer was 'Haemoglobin level in g/L or g/dL' at question '5 [RBC3]' (The next questions will ask about the threshold(s) which you use for red cell/blood transfusion in preterm babies. Please select which units your hospital uses to decide whether a blood transfusion is necessary)

|                                                                                                                                                                                                                                   | less than 24 hours of age | 24 hours to 7 days of age | 2 weeks of age | 3 weeks of age |
|-----------------------------------------------------------------------------------------------------------------------------------------------------------------------------------------------------------------------------------|---------------------------|---------------------------|----------------|----------------|
| Infant on no added oxygen or respiratory support (g/L)                                                                                                                                                                            |                           |                           |                |                |
| Infant on <2L/min added oxygen by low flow nasal cannula (g/L)                                                                                                                                                                    |                           |                           |                |                |
| Infant on 21-30% oxygen by non-invasive respiratory support (Including continuous positive airway pressure (CPAP), Biphasic intermittent positive airway pressure (BiPAP; synchronised or unsynchronised), nasal high flow) (g/L) |                           |                           |                |                |
| Infant on >30% oxygen by non-invasive respiratory support (g/L)                                                                                                                                                                   |                           |                           |                |                |
| Infant who is intubated and ventilated (g/L)                                                                                                                                                                                      |                           |                           |                |                |

**What haematocrit would use you as a threshold to transfuse the following babies born at <32 weeks' GA?**

Please give answers as haematocrit percentage. e.g. haematocrit 0.1 = 10% = answer 10

Only answer this question if the following conditions are met: Answer was 'Haematocrit' at question '5 [RBC3]' (The next questions will ask about the threshold(s) which you use for red cell/blood transfusion in preterm babies. Please select which units your hospital uses to decide whether a blood transfusion is necessary)

|                                          | less than 24 hours of age | 24 hours to 7 days of age | 2 weeks of age | 3 weeks of age |
|------------------------------------------|---------------------------|---------------------------|----------------|----------------|
| Infant on no added oxygen or respiratory |                           |                           |                |                |

|                                                                                                                                                                                                                             | less than 24 hours of age | 24 hours to 7 days of age | 2 weeks of age | 3 weeks of age |
|-----------------------------------------------------------------------------------------------------------------------------------------------------------------------------------------------------------------------------|---------------------------|---------------------------|----------------|----------------|
| support                                                                                                                                                                                                                     |                           |                           |                |                |
| Infant on <2L/min added oxygen by low flow nasal cannula                                                                                                                                                                    |                           |                           |                |                |
| Infant on 21-30% oxygen by non-invasive respiratory support (Including continuous positive airway pressure (CPAP), Biphasic intermittent positive airway pressure (BiPAP; synchronised or unsynchronised), nasal high flow) |                           |                           |                |                |
| Infant on >30% oxygen by non-invasive respiratory support                                                                                                                                                                   |                           |                           |                |                |
| Infant who is intubated and ventilated                                                                                                                                                                                      |                           |                           |                |                |

**What volume of red cells would you typically transfuse to a haemodynamically stable baby on your neonatal unit?**

Please give your answer in **ml/kg**. Only numbers may be entered in this field.

Please write your answer here: ...

**Over what duration would you normally give an RBC transfusion in a haemodynamically stable baby born at <32 weeks?**

Choose one of the following answers. Please choose **only one** of the following:

6 hours / 5 hours / 4 hours / 3 hours / 2 hours / 1 hour / 30 minutes / 15 minutes / Other

**Do you withhold enteral feeds during red blood cell transfusions for babies born <32 weeks gestational age? (if you choose 'sometimes', please specify when you would withhold feeds)**

Choose one of the following answers. Please choose **only one** of the following:

Yes / No / Sometimes

## Platelets

please answer the following questions

**At which platelet count threshold would you usually transfuse the following babies in the first week since birth? (answers given as  $\times 10^9/L$  or micromol/L)**

|                                          | Stable, no bleeding | Active bleeding e.g. new intraventricular haemorrhage | Undergoing ibuprofen treatment for PDA | Before a lumbar puncture | Before major surgery (e.g. laparotomy) |
|------------------------------------------|---------------------|-------------------------------------------------------|----------------------------------------|--------------------------|----------------------------------------|
| An infant born at <28 weeks' gestation   |                     |                                                       |                                        |                          |                                        |
| An infant born at 28-32 weeks' gestation |                     |                                                       |                                        |                          |                                        |

**Which form of platelets does your unit use for neonatal transfusions?**

Choose one of the following answers. Please choose **only one** of the following:

- Standard/Normal concentration platelets
- Platelet hyperconcentrate
- I do not know
- Other

**What volume of platelets would you typically transfuse to a haemodynamically stable baby on your NNU?**

Please give your answer in **ml/kg**. e.g. '15' = 15ml/kg. Only numbers may be entered in this field.

Please write your answer here: ...

**Over what duration would you normally transfuse platelets in a haemodynamically stable baby on your NNU?**

Choose one of the following answers. Please choose **only one** of the following:

4 hours / 3 hours / 2 hours / 1 hour / 30 mins / 15 mins / Other

## Plasma/Fresh Frozen Plasma

**For which main indication(s) would you prescribe fresh frozen plasma (FFP) to babies in your hospital?**

Check all that apply. Please choose **all** that apply:

- Volume replacement/hypotension
- Active bleeding without coagulopathy
- Coagulopathy with no active bleeding
- Coagulopathy with active bleeding
- Sepsis
- Other:

**Do you routinely perform coagulation/clotting tests in babies born <32weeks who are not bleeding?**

Choose one of the following answers. Please choose **only one** of the following:

Yes / No

**What volume of plasma/FFP would you usually administer to a haemodynamically stable baby born at <32 weeks on your NNU?**

Please give your answer in **ml/kg**. e.g. '15' = 15ml/kg. Only numbers may be entered in this field.

Please write your answer here: ...

**Over what duration would you usually give a plasma/FFP transfusion in a haemodynamically stable baby on your NNU?**

Choose one of the following answers. Please choose **only one** of the following:

4 hours / 3 hours / 2 hours / 1 hour / 30 mins / 15 mins / Other

**Do you use any of the following on your neonatal unit? (if yes, please indicate when you would use them)**

Comment only when you choose an answer. Please choose all that apply and provide a comment:

- Antithrombin III
- Tranexamic acid
- Another agent which promotes clotting/coagulation
- Another agent which prevents clotting/coagulation
- No

## Transfusion management

### Do you routinely prescribe diuretics alongside blood component transfusions?

Please choose the appropriate response for each item:

|                 | No, never | Yes, always | Yes, sometimes |
|-----------------|-----------|-------------|----------------|
| Red blood cells |           |             |                |
| Platelets       |           |             |                |
| Plasma/FFP      |           |             |                |

### In common practice on your unit, what consent do you obtain from parents for a non-emergency blood component transfusion?

Choose one of the following answers. Please choose **only one** of the following:

- No consent
- Verbal consent only
- Verbal consent documented in the notes by clinician
- Verbal and written consent from parents (parents have to sign a form)
- Other

### Would you be interested in participating in a national / international network to address further research questions in neonatal transfusion practice?

Over the coming year, you may be invited to taking part in a short point prevalence study on neonatal blood transfusions. This would involve collecting data on all neonatal transfusions on your unit for a short period of time.

Choose one of the following answers. Please choose **only one** of the following:

No thank you / Yes

Thank you very much for your time in answering our survey.

Submit your survey.

Thank you for completing this survey.



## **LIST OF PARTICIPATING NEONATAL (RESEARCH) NETWORKS**

To be added after review by national coordinators.
